# Supplementary material
Source: PubMed Central journal article supplement (PMC6560181)
Supplement: NIHMS1025918-supplement-Data_S1.pdf [file NIHMS1025918-supplement-Data_S1.pdf]

## Data S1. NMR spectra, statistics and chemical shifts. Related to Figure 2

**(A)** 1 H NMR spectrum of FADDI-118 (D2 O, 600 MHz). **(B)** Expansions of 1 H NMR spectrum of FADDI-118 (D2 O, 600 MHz). **(C)** 13 C NMR spectrum of FADDI-118 (D2 O, 150 MHz). **(D)** Expansions of 13 C NMR spectrum of FADDI-118 (D2 O, 150 MHz). **(E)** COSY NMR spectrum of FADDI-118 (D2 O). **(F)** TOCSY NMR spectrum of FADDI-118 (D2 O). **(G)** edHSQC NMR spectrum of FADDI-118 (D2 O). **(H)** HMBC NMR spectrum of FADDI-118 (D2 O). **(I)** 1H and 13C Chemical shifts for octapeptin C4 peptide in water at 22°C. **(J)** NMR statistics for the solution structure of octapeptin C4 and FADDI-115 in DPC micelles. **(K)** NMR assignments of FADDI-118 TFA salt in D2O (1H 600 MHz, 13C 150 MHz) derived from analysis of 2D NMR spectra.

**A**

FADDI-118 D2O 1H

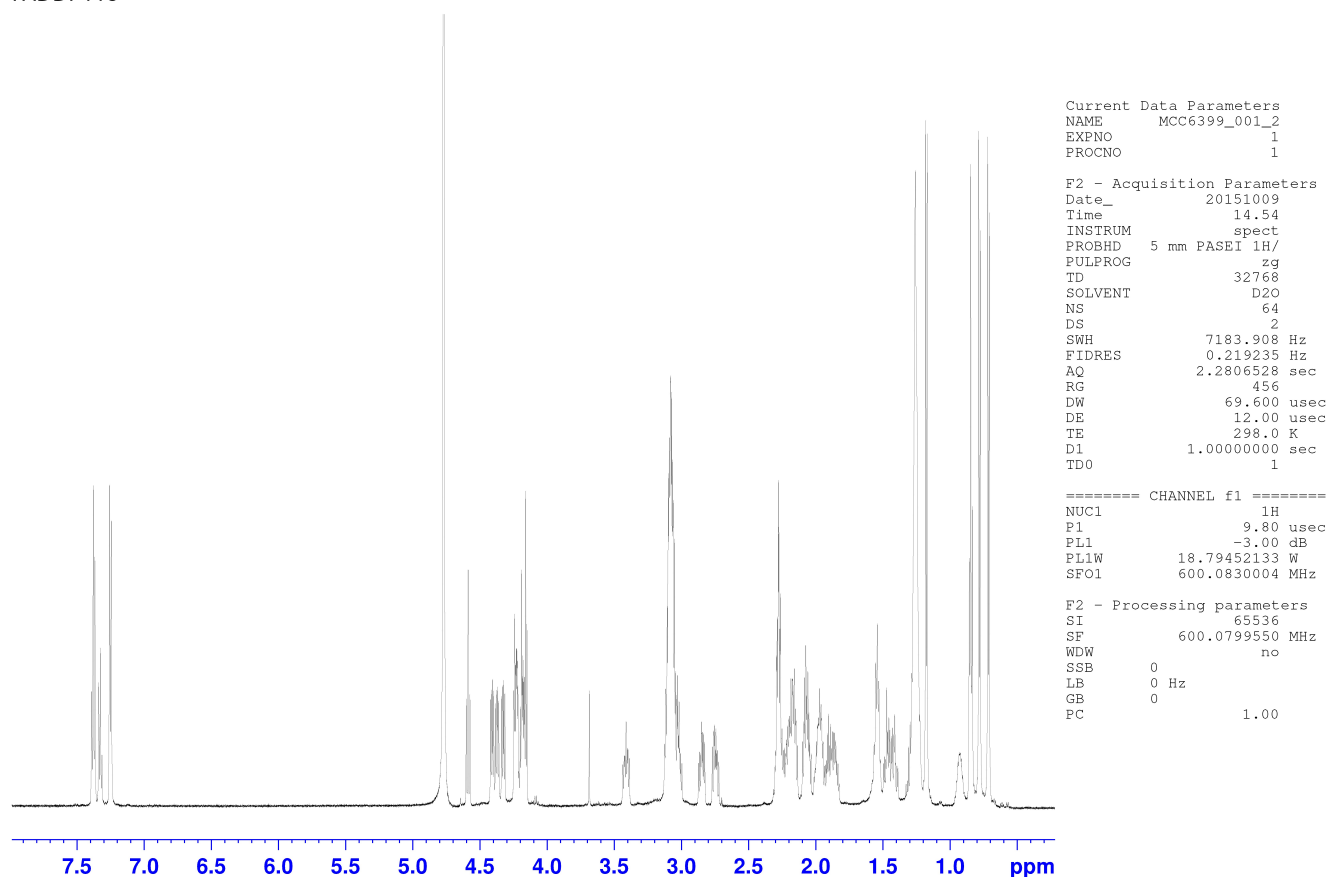

**B**

FADDI-118 D2O 1H

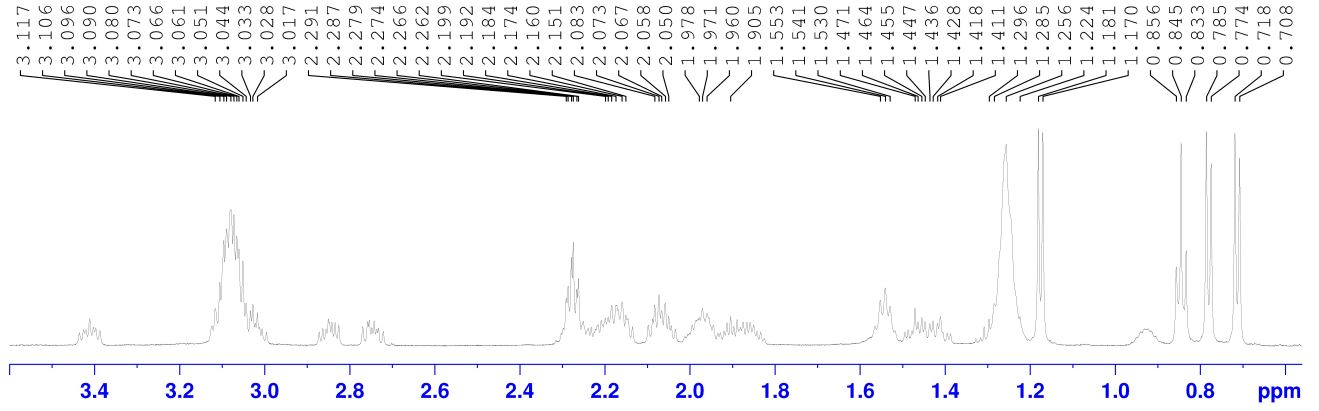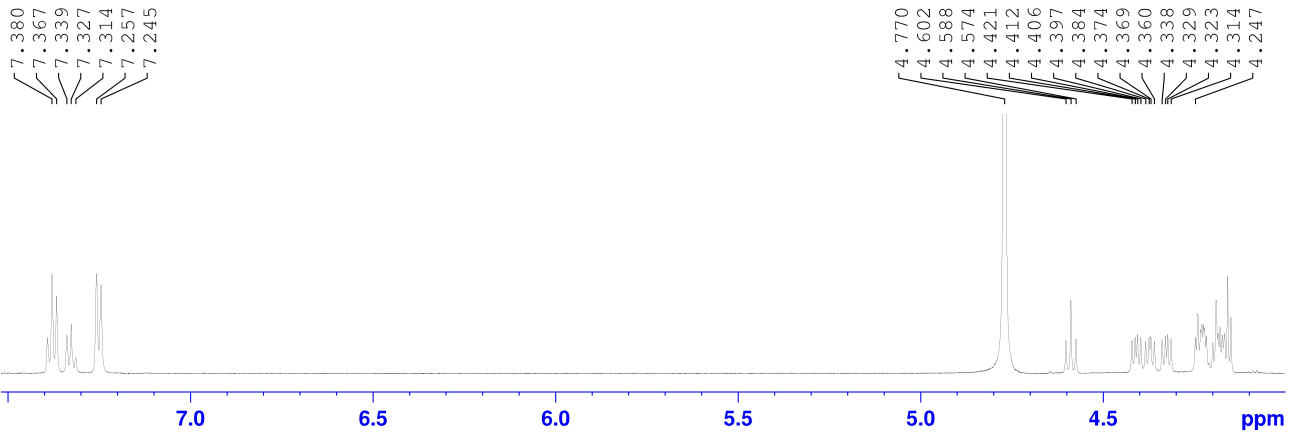

C

FADDI-118 D2O 13C

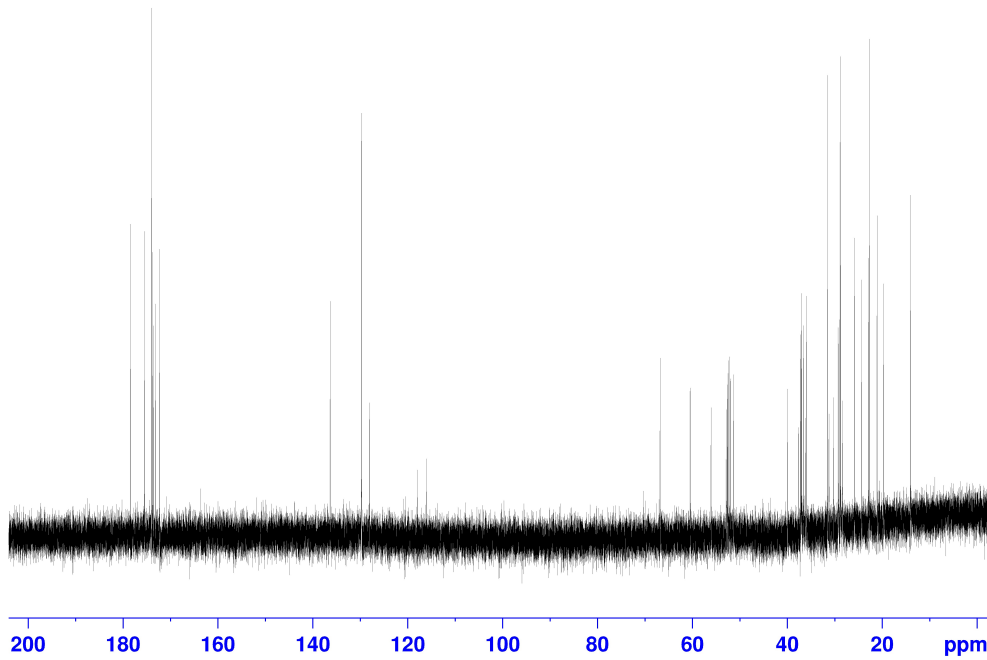

```
Current Data Parameters
NAME      MCC6399_001
EXPNO     7
PROCNO    1

F2 - Acquisition Parameters
Date_     20151010
Time      10.45
INSTRUM   spect
PROBHD    5 mm CPTCI 1H/
PULPROG   zgpg
TD         65536
SOLVENT   D2O
NS         7000
DS         4
SWH        39062.500 Hz
FIDRES     0.596046 Hz
AQ         0.8388608 sec
RG         6502
DW         12.800 usec
DE         21.96 usec
TE         298.0 K
D1         1.00000000 sec
D11        0.03000000 sec
TD0        1

===== CHANNEL f1 =====
NUC1       13C
P1         12.00 usec
PL1        -2.40 dB
PL1W       120.04185486 W
SFO1       150.9194078 MHz

===== CHANNEL f2 =====
CPDPRG[2] waltz16
NUC2       1H
PCPD2      80.00 usec
PL2         2.00 dB
PL12        16.83 dB
PL13         120.00 dB
PL2W        9.65199947 W
PL12W       0.31740758 W
PL13W       0 W
SFO2       600.1330006 MHz

F2 - Processing parameters
SI         65536
SF         150.9026950 MHz
WDW        no
SSB        0
LB         0 Hz
GB         0
PC         1.00
```

D

FADDI-118 D2O 13C

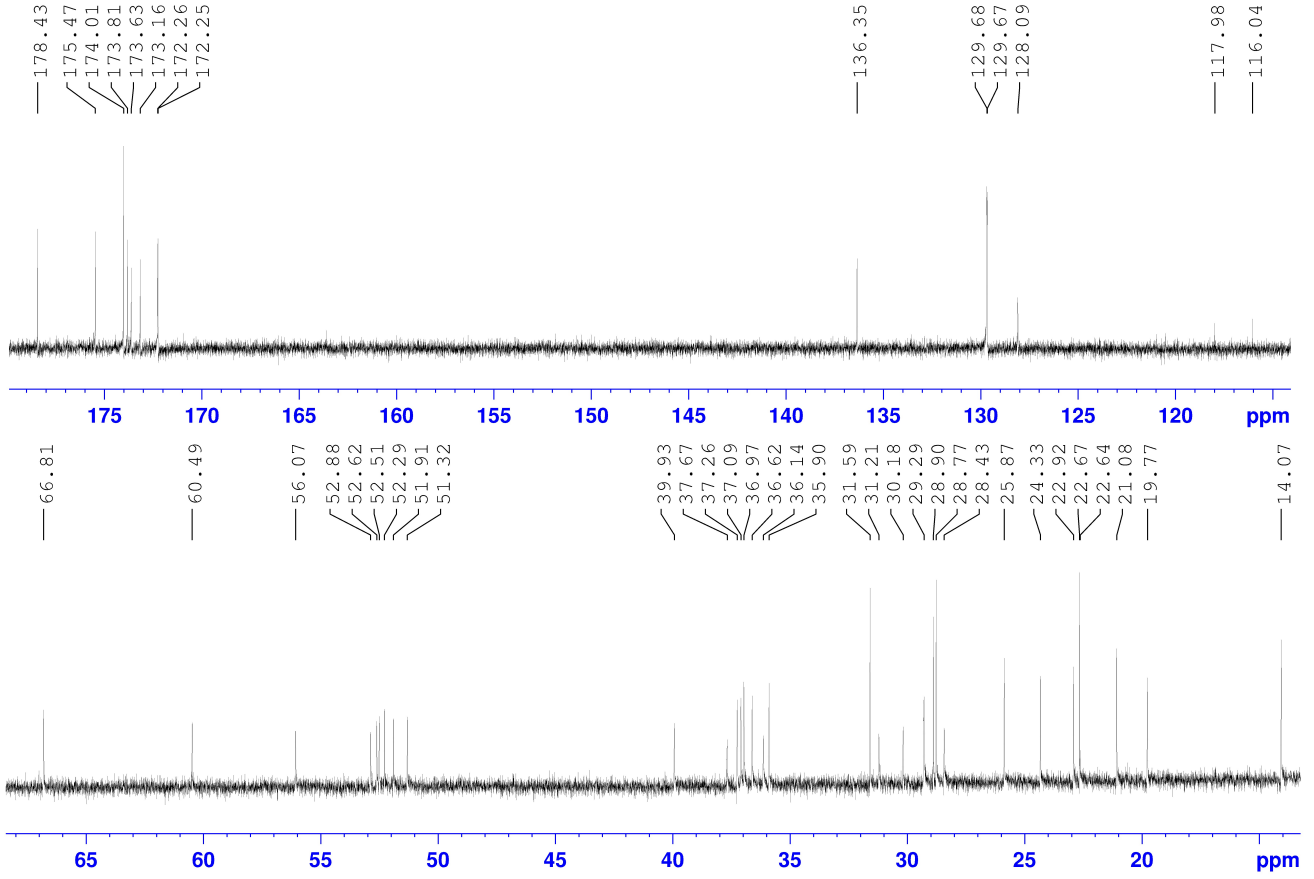

E

FADDI-118 D2O gCOSY

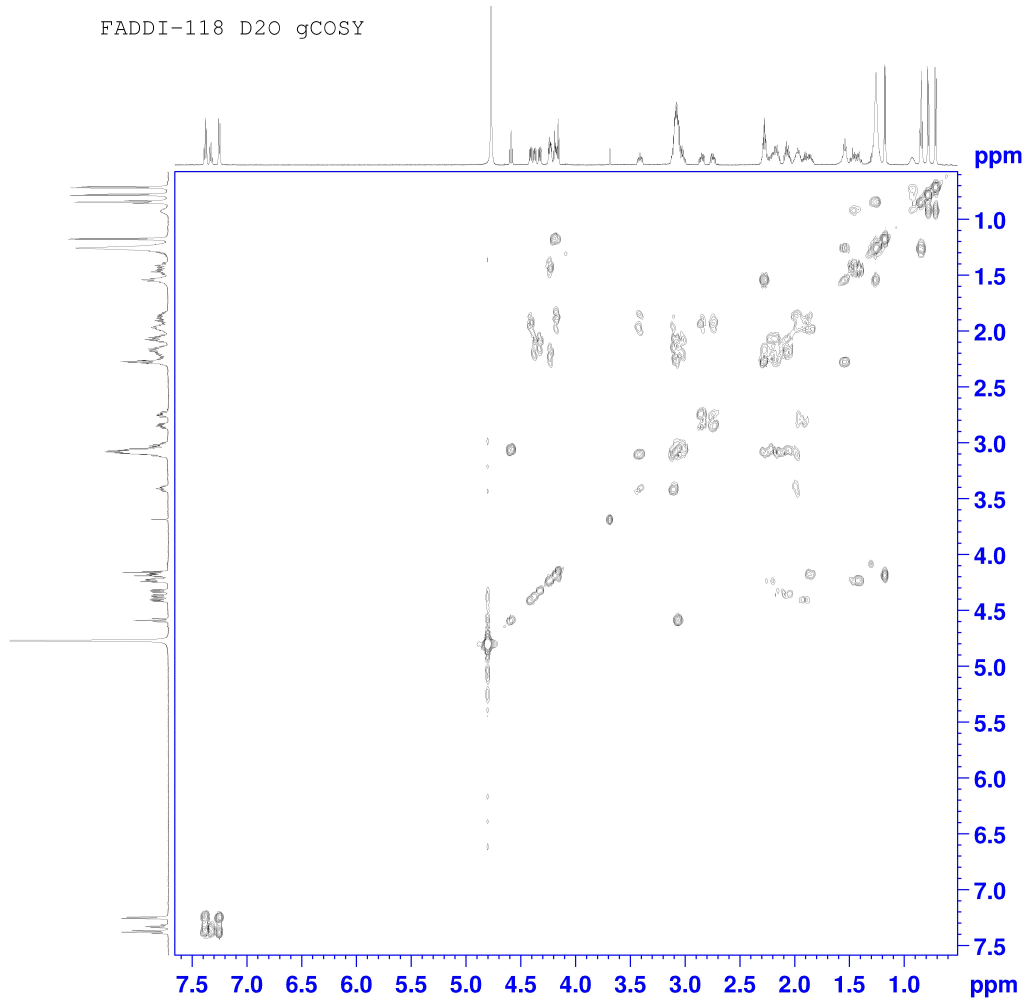

```
Current Data Parameters
NAME      MCC6399_001
EXPNO    2
PROCNO   1

F2 - Acquisition Parameters
Date_    20151008
Time     17.53
INSTRUM  spect
PROBHD   5 mm CPTCI 1H/
PULPROG  cosygpgf
TD       2048
SOLVENT  D2O
NS       8
DS       8
SWH      7183.908 Hz
FIDRES   3.507768 Hz
AQ       0.1425408 sec
RG       812.7
DW       69.600 usec
DE       12.00 usec
TE       298.1 K
D0       0.0000300 sec
D1       1.00000000 sec
D13      0.00000400 sec
D16      0.00020000 sec
IN0      0.00013920 sec

===== CHANNEL f1 =====
NUC1     1H
PQ       7.25 usec
F1       7.25 usec
PL1      2.00 dB
PL1W     9.65199947 W
SFO1     600.1330006 MHz

===== GRADIENT CHANNEL =====
GENAM[1] sine.100
GPZ1     10.00 %
P16      1000.00 usec

F1 - Acquisition parameters
TD       256
SFO1     600.133 MHz
FIDRES   56.124283 Hz
SW       11.971 ppm
FnMODE   QF

F2 - Processing parameters
SI       1024
SF       600.1299348 MHz
WDW      QSINE
SSB      0
LB       0 Hz
GB       0
PC       1.00

F1 - Processing parameters
SI       1024
MC2      QF
SF       600.1299369 MHz
WDW      QSINE
SSB      0
LB       0 Hz
GB       0
```

F

FADDI-118 D2O TOCSY

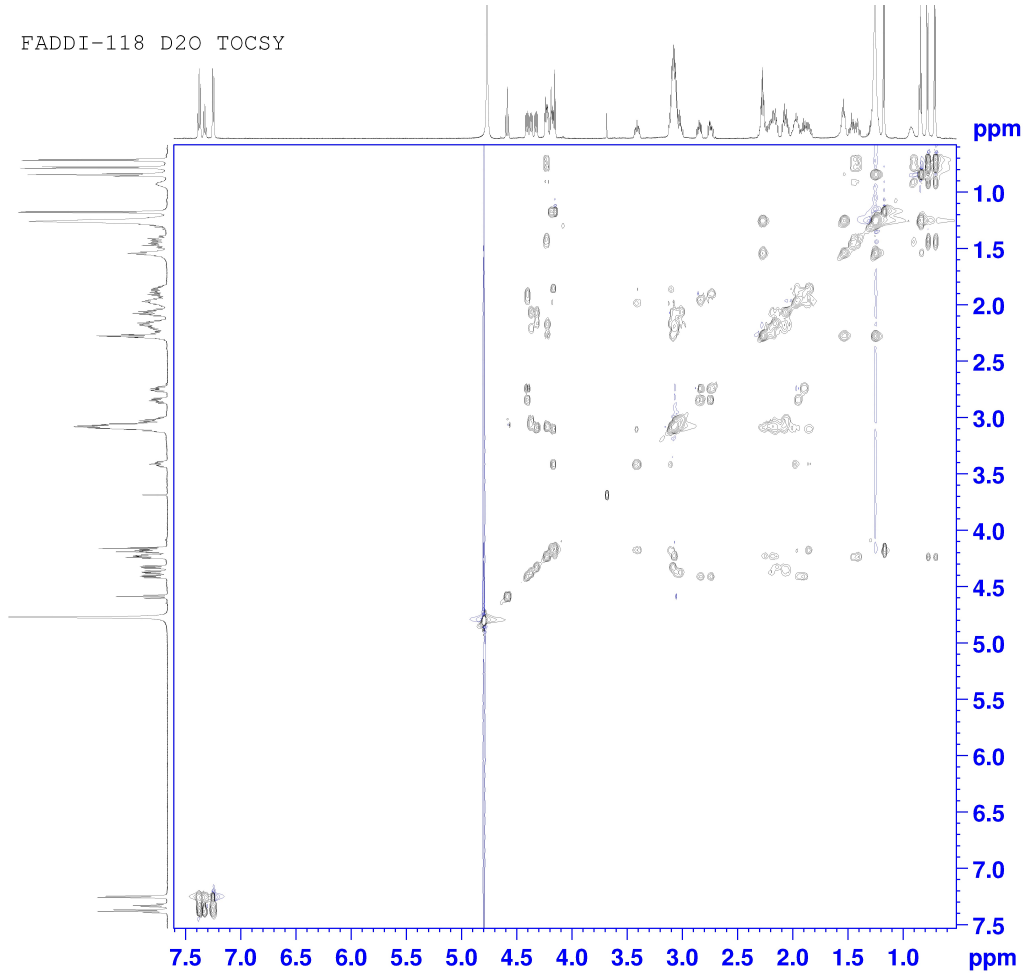

```
Current Data Parameters
NAME      MCC6399_001
EXPNO    5
PROCNO   1

F2 - Acquisition Parameters
Date_    20151008
Time     20.52
INSTRUM  spect
PROBHD   5 mm CPTCI 1H/
PULPROG  mlevaegpph
TD       2048
SOLVENT  D2O
NS       16
DS       16
SWH      7183.908 Hz
FIDRES   3.507768 Hz
AQ       0.1425408 sec
RG       574.7
DW       69.600 usec
DE       12.00 usec
TE       298.0 K
D0       0.0000498 sec
D1       2.0000000 sec
D9       0.0800000 sec
D12      0.0002000 sec
D16      0.0002000 sec
IN0      0.00013920 sec
LI       42

----- CHANNEL f1 -----
NUC1     1H
P1       7.25 usec
P2       14.50 usec
P5       15.65 usec
P6       28.00 usec
P7       56.00 usec
P12      2400.00 usec
P17      2500.00 usec
PL0      120.00 dB
PL1      2.00 dB
PL10     13.74 dB
PL1W     0 W
PL1W     9.65199947 W
PL1W     0.64657265 W
SFO1     600.1330006 MHz
SF1      41.76 dB
SFNAM[1] Sincl1.1000
SFOAL1   0 Hz
SFOFFS1  0.500

===== GRADIENT CHANNEL =====
GFNAM[1]  sine.100
GFNAM[2]  sine.100
GPZ1     31.00 %
GPZ2     11.00 %
P16     1000.00 usec

F1 - Acquisition parameters
TD       256
SFO1     600.133 MHz
FIDRES   56.124283 Hz
SN       11.971 ppm
F2MODE   States-TPPI

F2 - Processing parameters
SI       1024
SF       600.129364 MHz
WDW      QSINE
SSB      2
LB       0 Hz
GB       0
PC       1.00

F1 - Processing parameters
SI       1024
MC2     States-TPPI
SF       600.129347 MHz
WDW      QSINE
SSB      2
LB       0 Hz
GB       0
```

G

FADDI-118 D2O edHSQC

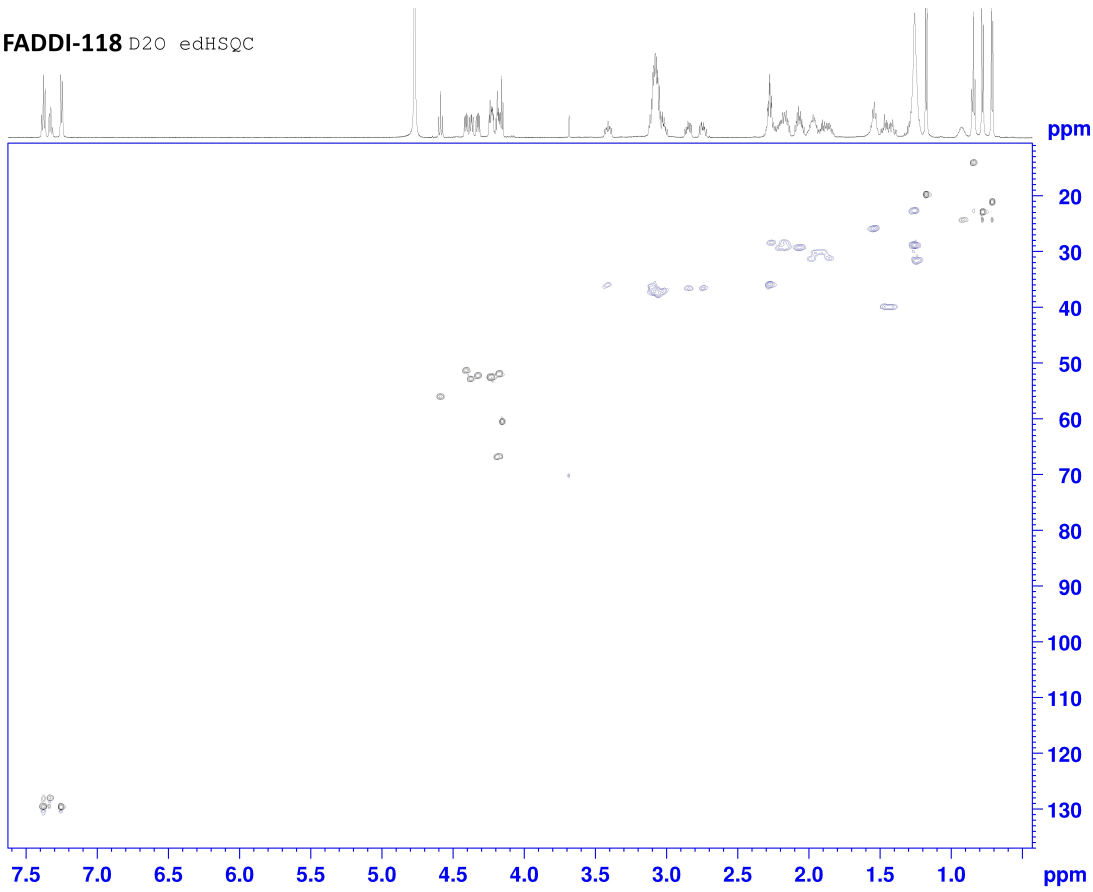

```
Current Data Parameters
NAME      MCC639_001
EXPNO    2
PROCNO   1
F2 - Acquisition Parameters
Date_    20110908
Time     18.16
INSTRUM  spect
PROBHD   5 mm CPT1 1H/
PULPROG  zgpg30
TD        65536
SOLVENT  D2O
NS        16
DS        4
SFO1     718.908 MHz
FIDRES   0.007168 Hz
AQ        0.1415408 sec
RG         500
SWH       49.600 usec
TE        12.00 usec
TE        298.0 K
CHU1     135.9000000
CHU2     -0.5000000
D1        0.0000000 sec
D2        0.0018185 sec
D3        0.0000000 sec
D4        0.0018185 sec
D5        0.0000000 sec
D6        0.0000000 sec
D7        0.0000000 sec
D8        0.0000000 sec
D9        0.0000000 sec
D10       0.0000000 sec
D11       0.0000000 sec
D12       0.0000000 sec
D13       0.0000000 sec
D14       0.0000000 sec
D15       0.0000000 sec
D16       0.0000000 sec
D17       0.0000000 sec
D18       0.0000000 sec
D19       0.0000000 sec
D20       0.0000000 sec
L31       1
===== CHANNEL f1 =====
NUC1      1H
P1        7.12 usec
PC        14.50 usec
PL1       0 usec
PL2       2.00 dB
PL3       0.6199947 dB
PL4       600.1317006 MHz
===== CHANNEL f2 =====
CPDPRG2  zgpg30
NUC2      13C
P2        11.80 usec
PC        11.80 usec
PL2       2000.00 usec
PL3       1500.00 usec
PL4       120.00 dB
PL5       -2.40 dB
PL6       13.21 dB
PL7       0 W
PL8       100.0418586 W
PL9       3.2986208 MHz
SFO1     150.9188008 MHz
SFO2     4.47 MHz
SFO3     4.47 MHz
SFO4     3.85 MHz
SFO5     11.97 MHz
SFO6     0.2001 MHz
SFO7     0.2001 MHz
SFO8     0.2001 MHz
SFO9     0.2001 MHz
SFO10    0.2001 MHz
SFO11    0.2001 MHz
SFO12    0.2001 MHz
SFO13    0.2001 MHz
SFO14    0.2001 MHz
SFO15    0.2001 MHz
SFO16    0.2001 MHz
SFO17    0.2001 MHz
SFO18    0.2001 MHz
SFO19    0.2001 MHz
SFO20    0.2001 MHz
SFO21    0.2001 MHz
SFO22    0.2001 MHz
SFO23    0.2001 MHz
SFO24    0.2001 MHz
SFO25    0.2001 MHz
SFO26    0.2001 MHz
SFO27    0.2001 MHz
SFO28    0.2001 MHz
SFO29    0.2001 MHz
SFO30    0.2001 MHz
SFO31    0.2001 MHz
SFO32    0.2001 MHz
SFO33    0.2001 MHz
SFO34    0.2001 MHz
SFO35    0.2001 MHz
SFO36    0.2001 MHz
SFO37    0.2001 MHz
SFO38    0.2001 MHz
SFO39    0.2001 MHz
SFO40    0.2001 MHz
SFO41    0.2001 MHz
SFO42    0.2001 MHz
SFO43    0.2001 MHz
SFO44    0.2001 MHz
SFO45    0.2001 MHz
SFO46    0.2001 MHz
SFO47    0.2001 MHz
SFO48    0.2001 MHz
SFO49    0.2001 MHz
SFO50    0.2001 MHz
SFO51    0.2001 MHz
SFO52    0.2001 MHz
SFO53    0.2001 MHz
SFO54    0.2001 MHz
SFO55    0.2001 MHz
SFO56    0.2001 MHz
SFO57    0.2001 MHz
SFO58    0.2001 MHz
SFO59    0.2001 MHz
SFO60    0.2001 MHz
SFO61    0.2001 MHz
SFO62    0.2001 MHz
SFO63    0.2001 MHz
SFO64    0.2001 MHz
SFO65    0.2001 MHz
SFO66    0.2001 MHz
SFO67    0.2001 MHz
SFO68    0.2001 MHz
SFO69    0.2001 MHz
SFO70    0.2001 MHz
SFO71    0.2001 MHz
SFO72    0.2001 MHz
SFO73    0.2001 MHz
SFO74    0.2001 MHz
SFO75    0.2001 MHz
SFO76    0.2001 MHz
SFO77    0.2001 MHz
SFO78    0.2001 MHz
SFO79    0.2001 MHz
SFO80    0.2001 MHz
SFO81    0.2001 MHz
SFO82    0.2001 MHz
SFO83    0.2001 MHz
SFO84    0.2001 MHz
SFO85    0.2001 MHz
SFO86    0.2001 MHz
SFO87    0.2001 MHz
SFO88    0.2001 MHz
SFO89    0.2001 MHz
SFO90    0.2001 MHz
SFO91    0.2001 MHz
SFO92    0.2001 MHz
SFO93    0.2001 MHz
SFO94    0.2001 MHz
SFO95    0.2001 MHz
SFO96    0.2001 MHz
SFO97    0.2001 MHz
SFO98    0.2001 MHz
SFO99    0.2001 MHz
SFO100   0.2001 MHz
===== GRADIENT CHANNEL =====
GPM1[1]  sim-1.00
GPM2[1]  sim-1.00
GPM3[1]  sim-1.00
GPM4[1]  sim-1.00
GPM5[1]  sim-1.00
GPM6[1]  sim-1.00
GPM7[1]  sim-1.00
GPM8[1]  sim-1.00
GPM9[1]  sim-1.00
GPM10[1] sim-1.00
GPM11[1] sim-1.00
GPM12[1] sim-1.00
GPM13[1] sim-1.00
GPM14[1] sim-1.00
GPM15[1] sim-1.00
GPM16[1] sim-1.00
GPM17[1] sim-1.00
GPM18[1] sim-1.00
GPM19[1] sim-1.00
GPM20[1] sim-1.00
GPM21[1] sim-1.00
GPM22[1] sim-1.00
GPM23[1] sim-1.00
GPM24[1] sim-1.00
GPM25[1] sim-1.00
GPM26[1] sim-1.00
GPM27[1] sim-1.00
GPM28[1] sim-1.00
GPM29[1] sim-1.00
GPM30[1] sim-1.00
GPM31[1] sim-1.00
GPM32[1] sim-1.00
GPM33[1] sim-1.00
GPM34[1] sim-1.00
GPM35[1] sim-1.00
GPM36[1] sim-1.00
GPM37[1] sim-1.00
GPM38[1] sim-1.00
GPM39[1] sim-1.00
GPM40[1] sim-1.00
GPM41[1] sim-1.00
GPM42[1] sim-1.00
GPM43[1] sim-1.00
GPM44[1] sim-1.00
GPM45[1] sim-1.00
GPM46[1] sim-1.00
GPM47[1] sim-1.00
GPM48[1] sim-1.00
GPM49[1] sim-1.00
GPM50[1] sim-1.00
GPM51[1] sim-1.00
GPM52[1] sim-1.00
GPM53[1] sim-1.00
GPM54[1] sim-1.00
GPM55[1] sim-1.00
GPM56[1] sim-1.00
GPM57[1] sim-1.00
GPM58[1] sim-1.00
GPM59[1] sim-1.00
GPM60[1] sim-1.00
GPM61[1] sim-1.00
GPM62[1] sim-1.00
GPM63[1] sim-1.00
GPM64[1] sim-1.00
GPM65[1] sim-1.00
GPM66[1] sim-1.00
GPM67[1] sim-1.00
GPM68[1] sim-1.00
GPM69[1] sim-1.00
GPM70[1] sim-1.00
GPM71[1] sim-1.00
GPM72[1] sim-1.00
GPM73[1] sim-1.00
GPM74[1] sim-1.00
GPM75[1] sim-1.00
GPM76[1] sim-1.00
GPM77[1] sim-1.00
GPM78[1] sim-1.00
GPM79[1] sim-1.00
GPM80[1] sim-1.00
GPM81[1] sim-1.00
GPM82[1] sim-1.00
GPM83[1] sim-1.00
GPM84[1] sim-1.00
GPM85[1] sim-1.00
GPM86[1] sim-1.00
GPM87[1] sim-1.00
GPM88[1] sim-1.00
GPM89[1] sim-1.00
GPM90[1] sim-1.00
GPM91[1] sim-1.00
GPM92[1] sim-1.00
GPM93[1] sim-1.00
GPM94[1] sim-1.00
GPM95[1] sim-1.00
GPM96[1] sim-1.00
GPM97[1] sim-1.00
GPM98[1] sim-1.00
GPM99[1] sim-1.00
GPM100[1] sim-1.00
===== CHANNEL f1 =====
F1 - Acquisition parameters
TE        12.00 usec
SFO1     150.9149 MHz
FIDRES   400.41383 Hz
F2       718.908 MHz
F3       150.90400 ppm
F4       Echo-antecho
F5       Echo-antecho
F6       Echo-antecho
F7       Echo-antecho
F8       Echo-antecho
F9       Echo-antecho
F10      Echo-antecho
F11      Echo-antecho
F12      Echo-antecho
F13      Echo-antecho
F14      Echo-antecho
F15      Echo-antecho
F16      Echo-antecho
F17      Echo-antecho
F18      Echo-antecho
F19      Echo-antecho
F20      Echo-antecho
F21      Echo-antecho
F22      Echo-antecho
F23      Echo-antecho
F24      Echo-antecho
F25      Echo-antecho
F26      Echo-antecho
F27      Echo-antecho
F28      Echo-antecho
F29      Echo-antecho
F30      Echo-antecho
F31      Echo-antecho
F32      Echo-antecho
F33      Echo-antecho
F34      Echo-antecho
F35      Echo-antecho
F36      Echo-antecho
F37      Echo-antecho
F38      Echo-antecho
F39      Echo-antecho
F40      Echo-antecho
F41      Echo-antecho
F42      Echo-antecho
F43      Echo-antecho
F44      Echo-antecho
F45      Echo-antecho
F46      Echo-antecho
F47      Echo-antecho
F48      Echo-antecho
F49      Echo-antecho
F50      Echo-antecho
F51      Echo-antecho
F52      Echo-antecho
F53      Echo-antecho
F54      Echo-antecho
F55      Echo-antecho
F56      Echo-antecho
F57      Echo-antecho
F58      Echo-antecho
F59      Echo-antecho
F60      Echo-antecho
F61      Echo-antecho
F62      Echo-antecho
F63      Echo-antecho
F64      Echo-antecho
F65      Echo-antecho
F66      Echo-antecho
F67      Echo-antecho
F68      Echo-antecho
F69      Echo-antecho
F70      Echo-antecho
F71      Echo-antecho
F72      Echo-antecho
F73      Echo-antecho
F74      Echo-antecho
F75      Echo-antecho
F76      Echo-antecho
F77      Echo-antecho
F78      Echo-antecho
F79      Echo-antecho
F80      Echo-antecho
F81      Echo-antecho
F82      Echo-antecho
F83      Echo-antecho
F84      Echo-antecho
F85      Echo-antecho
F86      Echo-antecho
F87      Echo-antecho
F88      Echo-antecho
F89      Echo-antecho
F90      Echo-antecho
F91      Echo-antecho
F92      Echo-antecho
F93      Echo-antecho
F94      Echo-antecho
F95      Echo-antecho
F96      Echo-antecho
F97      Echo-antecho
F98      Echo-antecho
F99      Echo-antecho
F100     Echo-antecho
F1 - Processing parameters
SI        32768
SF        600.1317006 MHz
WDW       EM
SSB       0 Hz
GB        0 Hz
PC        1.00
F1 - Processing parameters
SI        1024
NUC1     echo-antecho
SF        150.9028942 MHz
WDW       EM
SSB       0 Hz
GB        0 Hz
```

H

FADDI-118 D2O gHMBC

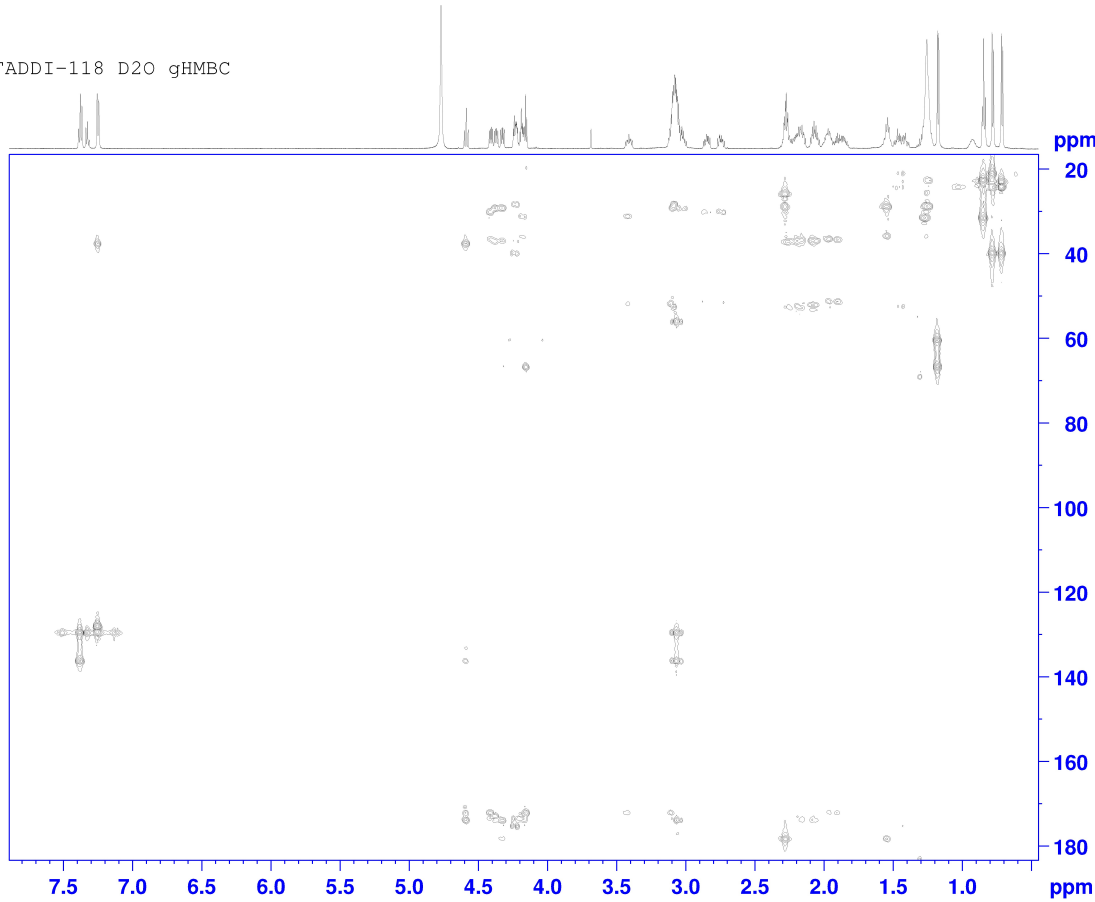

Current Data Parameters  
NAME MCC6399\_001  
EXPNO 4  
PROCNO 1

F2 - Acquisition Parameters  
Date\_ 20151010  
Time 10.49  
INSTRUM spect  
PROBHD 5 mm CPTCI 1H/  
PULPROG hmbcgp1pdqf  
TD 4096  
SOLVENT D2O  
NS 64  
DS 4  
SWH 7183.908 Hz  
FIDRES 1.753884 Hz  
AQ 0.2850816 sec  
RG 46341  
RW 69.400 usec  
DE 12.00 usec  
TE 298.0 K  
CNST2 135.0000000  
CNST13 8.0000000  
D0 0.00000300 sec  
D1 2.00000000 sec  
D2 0.00370370 sec  
D6 0.00250000 sec  
D16 0.00020000 sec  
IN0 0.00001380 sec

==== CHANNEL f1 =====  
NUC1 1H  
P1 7.25 usec  
P2 14.50 usec  
PL1 2.00 dB  
PL1W 9.65199947 W  
SFO1 600.1330006 MHz

==== CHANNEL f2 =====  
NUC2 13C  
P3 11.60 usec  
PL2 -2.40 dB  
PL2W 120.04184846 W  
SFO2 150.9178988 MHz

==== GRADIENT CHANNEL =====  
GPNAM[1] sine.100  
GPNAM[2] sine.100  
GPNAM[3] sine.100  
GP21 50.00 %  
GP22 30.00 %  
GP23 40.10 %  
P16 1000.00 usec

F1 - Acquisition parameters  
TD 256  
SFO1 150.9179 MHz  
FIDRES 282.968231 Hz  
SW 239.298 ppm  
FnMODE QF

F2 - Processing parameters  
SI 1024  
SF 600.1299340 MHz  
SE  
WDW QSINE  
SSB 2  
LB 0 Hz  
GB 0  
PC 1.00

F1 - Processing parameters  
SI 1024  
MC2 QF  
SF 150.9027021 MHz  
WDW QSINE  
SSB 2  
LB 0 Hz  
GB 0



<sup>1</sup>H and <sup>13</sup>C Chemical shifts for octapeptin C4 peptide in water at 22°C.

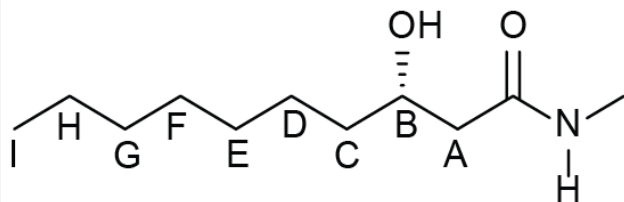

| Res  | Atom | Shift | Res | Atom | Shift  | Res | Atom | Shift | Res | Atom | Shift |
|------|------|-------|-----|------|--------|-----|------|-------|-----|------|-------|
| HDec | CA   | 45.61 | 2   | CA   | 54     | 4   | HA   | 4.58  | 7   | CA   | 54.49 |
| HDec | CB   | 71.58 | 2   | CB   | 33.22  | 4   | HN   | 8.78  | 7   | CB   | 31.48 |
| HDec | CC   | 38.88 | 2   | CG   | 38.03  | 4   | HZ   | 7.34  | 7   | CG   | 39.08 |
| HDec | CD   | 27.24 | 2   | HA   | 4.15   | 4   | QB   | 3.08  | 7   | HA   | 4.32  |
| HDec | CE   | 31.01 | 2   | HB2  | 2      | 4   | QD   | 7.26  | 7   | HB2  | 2.15  |
| HDec | CF   | 30.99 | 2   | HB3  | 1.86   | 4   | QE   | 7.4   | 7   | HB3  | 2.03  |
| HDec | CG   | 33.62 | 2   | HD   | 7.92   |     |      |       | 7   | HG2  | 3.06  |
| HDec | CH   | 24.61 | 2   | HG2  | 3.44   | 5   | CA   | 54.39 | 7   | HG3  | 3     |
| HDec | CI   | 15.97 | 2   | HG3  | 3.08   | 5   | CB   | 41.89 | 7   | HN   | 8.34  |
| HDec | HA1  | 2.52  | 2   | HN   | 8.56   | 5   | CD1  | 24.78 |     |      |       |
| HDec | HA2  | 2.39  |     |      |        | 5   | CD2  | 22.98 | 8   | CA   | 55.62 |
| HDec | HB   | 3.99  | 3   | CA   | 53.13  | 5   | CG2  | 26.13 | 8   | CB   | 41.13 |
| HDec | QC   | 1.51  | 3   | CB   | 32.13  | 5   | HA   | 4.24  | 8   | CD1  | 24.46 |
| HDec | HD1  | 1.3   | 3   | CG   | 38.66  | 5   | HG   | 0.87  | 8   | CD2  | 23.55 |
| HDec | HD2  | 1.39  | 3   | HA   | 4.47   | 5   | HN   | 8.56  | 8   | CG2  | 26.84 |
| HDec | QE   | 1.3   | 3   | HB2  | 2      | 5   | QB   | 1.44  | 8   | HA   | 4.24  |
| HDec | QF   | 1.27  | 3   | HB3  | 1.93   | 5   | QD1  | 0.78  | 8   | HG   | 1.54  |
| HDec | QG   | 1.26  | 3   | HG2  | 2.89   | 5   | QD2  | 0.71  | 8   | HN   | 8.29  |
| HDec | QH   | 1.28  | 3   | HG3  | 2.77   |     |      |       | 8   | QB   | 1.62  |
| HDec | QI   | 0.86  | 3   | HN   | 8.31   | 6   | CA   | 54.72 | 8   | QD1  | 0.92  |
| 1    | CA   | 54.19 |     |      |        | 6   | CB   | 30.28 | 8   | QD2  | 0.87  |
| 1    | CB   | 31.23 | 4   | CA   | 58.16  | 6   | CG   | 39.28 |     |      |       |
| 1    | CG   | 39.07 | 4   | CB   | 39.34  | 6   | HA   | 4.21  |     |      |       |
| 1    | HA   | 4.38  | 4   | CD   | 131.53 | 6   | HB2  | 2.26  |     |      |       |
| 1    | HB2  | 2.21  | 4   | CE   | 131.48 | 6   | HB3  | 2.2   |     |      |       |
| 1    | HB3  | 2.1   | 4   | CZ   | 129.93 | 6   | HN   | 8.42  |     |      |       |
| 1    | HN   | 8.52  |     |      |        | 6   | QG   | 3.1   |     |      |       |
| 1    | QG   | 3.13  |     |      |        |     |      |       |     |      |       |

The nomenclature of the *R*-3-hydroxydecanoyl (HDec) group is shown below. Protons with the same apparent chemical shift in the <sup>1</sup>H NMR spectrum are denoted by the pseudoatom Q.

<sup>1</sup>H and <sup>13</sup>C Chemical shifts for FADDI-115 peptide in water at 22°C

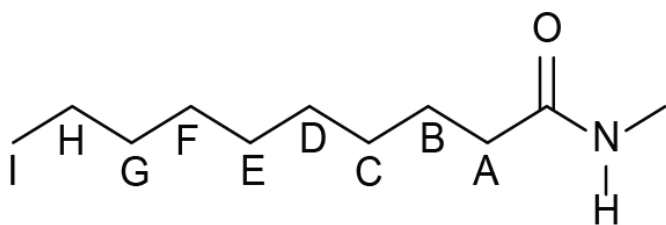

| Res | Atom  | Shift | Res | Atom | Shift  | Res | Atom | Shift | Res | Atom | Shift |
|-----|-------|-------|-----|------|--------|-----|------|-------|-----|------|-------|
| Dec | CA    | 38.42 | 2   | CA   | 54.58  | 4   | HA   | 4.57  | 7   | CA   | 55.05 |
| Dec | CB    | 28.36 | 2   | CB   | 33.85  | 4   | HN   | 8.72  | 7   | CB   | 32.14 |
| Dec | CC    | 31.62 | 2   | CG   | 38.65  | 4   | HZ   | 7.32  | 7   | CG   | 39.79 |
| Dec | C-DEF | 31.82 | 2   | HA   | 4.14   | 4   | QB   | 3.07  | 7   | HA   | 4.32  |
| Dec | CG    | 34.34 | 2   | HB2  | 1.96   | 4   | QD   | 7.25  | 7   | HB2  | 2.14  |
| Dec | CH    | 25.24 | 2   | HB3  | 1.84   | 4   | QE   | 7.38  | 7   | HB3  | 2.01  |
| Dec | CI    | 16.6  | 2   | HD   | 7.93   |     |      |       | 7   | HG2  | 3.03  |
| Dec | QA    | 2.28  | 2   | HG2  | 3.44   | 5   | CA   | 55.03 | 7   | HG3  | 2.97  |
| Dec | QB    | 1.54  | 2   | HG3  | 3.06   | 5   | CB   | 42.52 | 7   | HN   | 8.33  |
| Dec | QC    | 1.26  | 2   | HN   | 8.58   | 5   | CD1  | 25.4  |     |      |       |
| Dec | Q-DEF | 1.27  |     |      |        | 5   | CD2  | 23.61 | 8   | CA   | 56.23 |
| Dec | QG    | 1.27  | 3   | CA   | 53.83  | 5   | CG2  | 26.82 | 8   | CB   | 41.82 |
| Dec | QH    | 1.26  | 3   | CB   | 32.72  | 5   | HA   | 4.24  | 8   | CD1  | 25.09 |
| Dec | QI    | 0.84  | 3   | CG   | 39.34  | 5   | HG   | 0.9   | 8   | CD2  | 24.17 |
|     |       |       | 3   | HA   | 4.42   | 5   | HN   | 8.54  | 8   | CG2  | 27.47 |
| 1   | CA    | 54.91 | 3   | HB2  | 1.96   | 5   | QB   | 1.42  | 8   | HA   | 4.23  |
| 1   | CB    | 31.9  | 3   | HB3  | 1.91   | 5   | QD1  | 0.78  | 8   | HG   | 1.52  |
| 1   | CG    | 40.01 | 3   | HG2  | 2.87   | 5   | QD2  | 0.71  | 8   | HN   | 8.26  |
| 1   | HA    | 4.32  | 3   | HG3  | 2.75   |     |      |       | 8   | QB   | 1.59  |
| 1   | HB2   | 2.16  | 3   | HN   | 8.24   | 6   | CA   | 55.38 | 8   | QD1  | 0.91  |
| 1   | HB3   | 2.08  |     |      |        | 6   | CB   | 30.81 | 8   | QD2  | 0.82  |
| 1   | HN    | 8.43  | 4   | CA   | 58.66  | 6   | CG   | 39.68 |     |      |       |
| 1   | QG    | 3.1   | 4   | CB   | 40.08  | 6   | HA   | 4.18  |     |      |       |
|     |       |       | 4   | CD   | 132.18 | 6   | HB2  | 2.26  |     |      |       |
|     |       |       | 4   | CE   | 132.11 | 6   | HB3  | 2.17  |     |      |       |
|     |       |       | 4   | CZ   | 130.56 | 6   | HN   | 8.46  |     |      |       |
|     |       |       |     |      |        | 6   | QG   | 3.1   |     |      |       |

The nomenclature of the decanoyl (Dec) group is shown below. Protons with the same apparent chemical shift in the <sup>1</sup>H NMR spectrum are denoted by the pseudoatom Q.

$^3J_{\text{HNH}\alpha}$  (Hz) and  $^1\text{H}$  amide temperature coefficients ( $\Delta T_{\text{HN}} \times 10^3$ ) for octapeptin C4 and FADDI-115 peptide in water at 22°C

| Octapeptin C4 |                               |                                    | FADDI-115 |                               |                                    |
|---------------|-------------------------------|------------------------------------|-----------|-------------------------------|------------------------------------|
| Residue       | $^3J_{\text{HNH}\alpha}$ (Hz) | $\Delta T_{\text{HN}} \times 10^3$ | Residue   | $^3J_{\text{HNH}\alpha}$ (Hz) | $\Delta T_{\text{HN}} \times 10^3$ |
| 1             | 6.75                          | $-6.73 \pm 0.25$                   | 1         | 6.3                           | $-7.8 \pm 0.14$                    |
| 2             | 6.86                          | $-6.80 \pm 0.25$                   | 2         | 6.98                          | $-7.6 \pm 0.17$                    |
| 3             | 8.28                          | $-4.90 \pm 0.25$                   | 3         | 7.4                           | $-4.5 \pm 0.13$                    |
| 4             | 5.8                           | $-9.10 \pm 0.08$                   | 4         | 5.90                          | $-8.9 \pm 0.14$                    |
| 5             | 8.12                          | $-8.76 \pm 0.03$                   | 5         | 7.89                          | $-9.8 \pm 0.22$                    |
| 6             | 5.3                           | $-4.23 \pm 0.06$                   | 6         | 6.5                           | $-4.6 \pm 0.09$                    |
| 7             | 4.4                           | $-0.87 \pm 0.13$                   | 7         | 5.12                          | $-2.0 \pm 0.13$                    |
| 8             | 6.38                          | $-9.70 \pm 0.13$                   | 8         | 6.7                           | $-10.1 \pm 0.23$                   |
| 2HD           | 8.2, 4.5                      | $-8.40 \pm 0.22$                   | 2HD       | 8.6, 4.3                      | $-8.6 \pm 0.27$                    |

<sup>1</sup>H and <sup>13</sup>C Chemical shifts for octapeptin C4 peptide in 120 mM DPC at 25°C

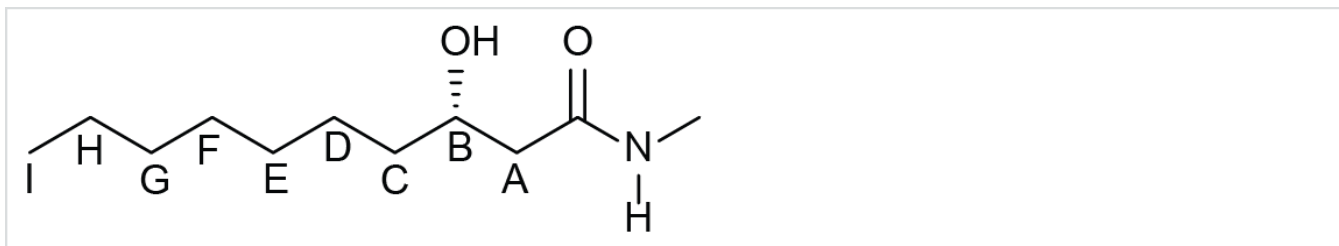

| Res | Atom | Shift | Res | Atom | Shift  | Res | Atom | Shift | Res | Atom | Shift |
|-----|------|-------|-----|------|--------|-----|------|-------|-----|------|-------|
| Dec | CA   | 44.5  | 2   | CA   | 52.09  | 4   | HA   | 4.48  | 7   | CA   | 53.31 |
| Dec | CB   | 70.27 | 2   | CB   | 30.73  | 4   | HB2  | 2.96  | 7   | CB   | 29.67 |
| Dec | CC   | 38.37 | 2   | CG   | 36.14  | 4   | HB3  | 3.02  | 7   | CG   | 37.44 |
| Dec | CD   | 26.83 | 2   | HA   | 3.92   | 4   | HN   | 8.9   | 7   | HA   | 4.25  |
| Dec | CE   | 30.62 | 2   | HB2  | 2.07   | 4   | HZ   | 7.11  | 7   | HB2  | 2.08  |
| Dec | CF   | 31.13 | 2   | HB3  | 1.92   | 4   | QD   | 7.19  | 7   | HB3  | 1.99  |
| Dec | CG   | 32.93 | 2   | HD   | 7.43   | 4   | QE   | 7.21  | 7   | HG2  | 3.01  |
| Dec | CH   | 23.6  | 2   | HG2  | 3.5    |     |      |       | 7   | HN   | 8.42  |
| Dec | CI   | 14.85 | 2   | HG3  | 2.95   | 5   | CA   | 52.19 |     |      |       |
| Dec | HA1  | 2.4   | 2   | HN   | 8.51   | 5   | CB   | 39.86 | 8   | CA   | 53.85 |
| Dec | HA2  | 2.3   |     |      |        | 5   | CD1  | 24.02 | 8   | CB   | 39.7  |
| Dec | QB   | 3.88  | 3   | CA   | 51.57  | 5   | CD2  | 22.07 | 8   | CD1  | 23.62 |
| Dec | HC1  | 1.48  | 3   | CB   | 29.78  | 5   | CG2  | 25.56 | 8   | CD2  | 22.1  |
| Dec | HC2  | 1.43  | 3   | CG   | 37.18  | 5   | HA   | 4.29  | 8   | CG2  | 25.98 |
| Dec | HD1  | 1.43  | 3   | HA   | 4.42   | 5   | HG   | 1.49  | 8   | HA   | 4.12  |
| Dec | HD2  | 1.28  | 3   | HB2  | 1.97   | 5   | HN   | 8.14  | 8   | HG   | 1.52  |
| Dec | QE   | 1.26  | 3   | HB3  | 1.95   | 5   | QB   | 1.43  | 8   | HN   | 8.09  |
| Dec | QF   | 1.18  | 3   | HG3  | 2.87   | 5   | QD1  | 0.77  | 8   | QB   | 1.64  |
| Dec | QG   | 1.24  | 3   | HN   | 7.98   | 5   | QD2  | 0.7   | 8   | QD1  | 0.89  |
| Dec | QH   | 1.24  |     |      |        |     |      |       | 8   | QD2  | 0.82  |
| Dec | QI   | 0.83  | 4   | CA   | 56.07  | 6   | CA   | 53.94 |     |      |       |
| 1   | CA   | 53.86 | 4   | CB   | 37.64  | 6   | CB   | 29.02 |     |      |       |
| 1   | CB   | 29.04 | 4   | CD   | 130.26 | 6   | CG   | 37.67 |     |      |       |
| 1   | CG   | 37.61 | 4   | CE   | 129.27 | 6   | HA   | 4.22  |     |      |       |
| 1   | HA   | 4.19  | 4   | CZ   | 127.49 | 6   | HB2  | 2.17  |     |      |       |
| 1   | HB2  | 2.11  |     |      |        | 6   | HB3  | 2.14  |     |      |       |
| 1   | HB3  | 2.08  |     |      |        | 6   | HN   | 8.53  |     |      |       |
| 1   | HN   | 8.86  |     |      |        | 6   | QG   | 3.1   |     |      |       |
| 1   | QG   | 3.04  |     |      |        |     |      |       |     |      |       |

The nomenclature of the R-3-hydroxydecanoyl (HDec) group is shown below. Protons with the same apparent chemical shift in the <sup>1</sup>H NMR spectrum are denoted by the pseudoatom Q.

<sup>1</sup>H and <sup>13</sup>C Chemical shifts for FADDI-115 peptide in 120 mM DPC at 25°C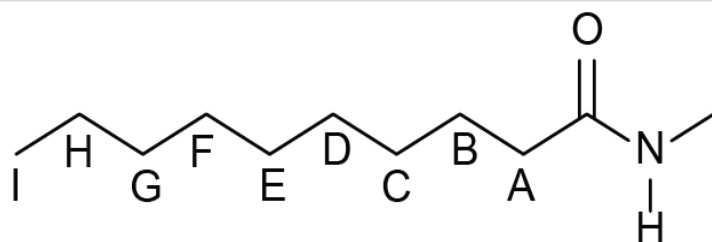

| Res | Atom  | Shift | Res | Atom | Shift  | Res | Atom | Shift | Res | Atom | Shift |
|-----|-------|-------|-----|------|--------|-----|------|-------|-----|------|-------|
| Dec | CA    | 36.15 | 2   | CA   | 51.47  | 4   | HA   | 4.51  | 7   | CA   | 54.05 |
| Dec | CB    | 26.42 | 2   | CB   | 30.82  | 4   | HN   | 8.72  | 7   | CB   | 29.54 |
| Dec | CC    | 30.69 | 2   | CG   | 35.97  | 4   | HZ   | 7.11  | 7   | HA   | 4.26  |
| Dec | C-DEF | 31.28 | 2   | HA   | 4.09   | 4   | QB   | 2.97  | 7   | HB2  | 2.08  |
| Dec | CG    | 32.92 | 2   | HB2  | 2.12   | 4   | QD   | 7.2   | 7   | HB3  | 1.97  |
| Dec | CH    | 23.69 | 2   | HB3  | 1.81   | 4   | QE   | 7.2   | 7   | HG2  | 3.03  |
| Dec | CI    | 14.88 | 2   | HG2  | 3.51   |     |      |       | 7   | HG3  | 3     |
| Dec | HA2   | 2.29  | 2   | HG3  | 2.95   | 5   | CB   | 39.7  | 7   | HN   | 8.79  |
| Dec | HA3   | 2.18  | 2   | HN   | 8.65   | 5   | CD1  | 23.99 |     |      |       |
| Dec | HB2   | 1.52  | 2   | HND  | 7.43   | 5   | CD2  | 22.14 | 8   | CA   | 53.58 |
| Dec | HB3   | 1.47  |     |      |        | 5   | CG2  | 30.36 | 8   | CB   | 39.83 |
| Dec | QC    | 1.23  | 3   | CA   | 51.9   | 5   | HA   | 4.35  | 8   | CD1  | 23.56 |
| Dec | Q-DEF | 1.21  | 3   | CB   | 29.61  | 5   | HB2  | 1.47  | 8   | CD2  | 22.01 |
| Dec | QG    | 1.23  | 3   | CG   | 37.21  | 5   | HB3  | 1.44  | 8   | CG2  | 25.33 |
| Dec | QH    | 1.23  | 3   | HA   | 4.36   | 5   | HG   | 1.16  | 8   | HA   | 4.17  |
| Dec | QI    | 0.82  | 3   | QB   | 1.94   | 5   | HN   | 8.33  | 8   | HB2  | 1.66  |
|     |       |       | 3   | QG   | 2.84   | 5   | QD1  | 0.8   | 8   | HB3  | 1.62  |
| 1   | CA    | 53.55 | 3   | HN   | 7.96   | 5   | QD2  | 0.72  | 8   | HG   | 1.49  |
| 1   | CB    | 29.23 |     |      |        |     |      |       | 8   | HN   | 8.06  |
| 1   | CG    | 37.64 | 4   | CA   | 55.58  | 6   | CA   | 53.29 | 8   | QD1  | 0.89  |
| 1   | HA    | 4.13  | 4   | CB   | 37.66  | 6   | CB   | 28.8  | 8   | QD2  | 0.81  |
| 1   | HN    | 8.71  | 4   | CD   | 130.1  | 6   | CG   | 37.53 |     |      |       |
| 1   | QB    | 2.11  | 4   | CE   | 129.2  | 6   | HA   | 4.26  |     |      |       |
| 1   | QG    | 3.08  | 4   | CZ   | 127.36 | 6   | HN   | 8.59  |     |      |       |
|     |       |       |     |      |        | 6   | QB   | 2.17  |     |      |       |
|     |       |       |     |      |        | 6   | QG   | 3.09  |     |      |       |

The nomenclature of the decanoyl (Dec) group is shown below. Protons with the same apparent chemical shift in the <sup>1</sup>H NMR spectrum are denoted by the pseudoatom Q.

## J

NMR statistics for the solution structure of octapeptin C4 and FADDI-115 in DPC micelles.

| <b>NOE distance restraints</b>             | <b>Octapeptin C4</b>               | <b>FADDI-115</b>                 |
|--------------------------------------------|------------------------------------|----------------------------------|
| Total Number                               | 217                                | 192                              |
| Intra residual, $ i - j =0$                | 60                                 | 53                               |
| Sequential, $ i - j =1$                    | 83                                 | 88                               |
| Mediumrange, $1 <  i - j  < 5$             | 41                                 | 33                               |
| Long range <sup>a</sup> , $ i - j  \geq 5$ | 36                                 | 21                               |
| Maximal violation                          | 0.06                               | 0.12                             |
| Final CYANA target function value          | 0.0084 $\pm$ 0.0009 $\text{\AA}^2$ | 0.12 $\pm$ 0.0003 $\text{\AA}^2$ |
| RMSD to mean coordinates:                  |                                    |                                  |
| Back bone atoms N,C $^\alpha$ ,C'          | 0.05 $\pm$ 0.01 $\text{\AA}$       | 0.06 $\pm$ 0.01 $\text{\AA}$     |
| All heavy atoms                            | 0.38 $\pm$ 0.05 $\text{\AA}$       | 0.38 $\pm$ 0.08 $\text{\AA}$     |

<sup>a</sup>4 upper and 3 lower distance restraints were implemented to maintain an amide bond with trans geometry between Dab3 and Leu9 during the calculation and are included in the table.

## K

NMR assignments of FADDI-118 TFA salt in D<sub>2</sub>O (<sup>1</sup>H 600 MHz, <sup>13</sup>C 150 MHz) derived from analysis of 2D NMR spectra.<sup>a</sup>

| Amino Acid <sup>b</sup> | <sup>13</sup> C δ (ppm) <sup>c</sup> | <sup>1</sup> H δ (mult., J (Hz)) <sup>d</sup> | Amino Acid <sup>b</sup> | <sup>13</sup> C δ (ppm) <sup>c</sup> | <sup>1</sup> H δ (mult., J (Hz)) <sup>d</sup> |
|-------------------------|--------------------------------------|-----------------------------------------------|-------------------------|--------------------------------------|-----------------------------------------------|
| <b>Dab1</b>             |                                      |                                               | <b>Dab1</b>             |                                      |                                               |
| 1                       | 174.0*                               |                                               | 1                       | 173.6                                |                                               |
| 2                       | 52.3                                 | 4.33 (dd, 5.4, 9.2)                           | 2                       | 52.6                                 | 4.24 (dd, o)                                  |
| 3                       | 29.3*                                | 2.07 (m)                                      | 3                       | 28.4                                 | 2.19 (m)                                      |
| 4                       | 37.0 <sup>e</sup>                    | 2.15 (m)                                      | 4                       | 36.9 <sup>e</sup>                    | 2.25 (m)                                      |
|                         |                                      | 3.09 (m)                                      |                         |                                      | 3.08 (o)                                      |
| <b>Dab2</b>             |                                      |                                               | <b>Dab7</b>             |                                      |                                               |
| 1                       | 173.8                                |                                               | 1                       | 173.2                                |                                               |
| 2                       | 51.9                                 | 4.17 (o)                                      | 2                       | 52.9                                 | 4.37 (dd, 5.8, 8.8)                           |
| 3                       | 31.2                                 | 1.86 (m)                                      | 3                       | 29.3*                                | 2.07 (m)                                      |
|                         |                                      | 1.99 (m)                                      |                         |                                      | 2.19 (m)                                      |
| 4                       | 36.1                                 | 3.10 (o)                                      | 4                       | 37.3                                 | 3.02 (o)                                      |
|                         |                                      | 3.41 (ddd, 6.7, 9.3, 14.4)                    |                         |                                      | 3.05 (o)                                      |
| <b>Dab3</b>             |                                      |                                               | <b>Thr8</b>             |                                      |                                               |
| 1                       | 172.26                               |                                               | 1                       | 172.25                               |                                               |
| 2                       | 51.3                                 | 4.41 (dd, 5.4, 9.2)                           | 2                       | 60.1                                 | 4.16 (d, 5.4))                                |
| 3                       | 30.2                                 | 1.88 (m)                                      | 3                       | 39.2                                 | 4.19 (o)                                      |
|                         |                                      | 1.92 (m)                                      |                         |                                      |                                               |
| 4                       | 36.6                                 | 2.75 (ddd, 6.7, 9.3, 13.0)                    | 4                       | 19.8                                 | 1.18 (d, 6.3)                                 |
|                         |                                      | 2.85 (ddd, 5.1, 9.7, 13.0)                    |                         |                                      |                                               |
| <b>Phe4</b>             |                                      |                                               | <b>n-C8 fatty acid</b>  |                                      |                                               |
| 1                       | 174.0*                               |                                               | 1                       | 178.4                                |                                               |
| 2                       | 56.1                                 | 4.59 (t, 8.2)                                 | 2                       | 35.9                                 | 2.28 (o)                                      |
| 3                       | 37.7                                 | 3.06 (o)                                      | 3                       | 25.9                                 | 1.54 (tt, 6.5, 6.5)                           |
| 4                       | 136.4                                |                                               | 4                       | 29.9                                 | 1.26 (o)                                      |
| 7                       | 128.1                                | 7.33 (dd, 7.5, 7.5)                           | 5                       | 28.8                                 | 1.26 (o)                                      |
| 5,9                     | 129.67                               | 7.25 (d, 7.5)                                 | 6                       | 31.6                                 | 1.24 (o)                                      |
| 6,8                     | 129.68                               | 7.38 (dd, 7.5, 7.5)                           | 7                       | 22.7                                 | 1.25 (o)                                      |
| <b>Leu5</b>             |                                      |                                               | 8                       | 14.1                                 | 0.85 (t, 7.1)                                 |
| 1                       | 175.5                                |                                               |                         |                                      |                                               |
| 2                       | 52.5                                 | 4.24 (o)                                      |                         |                                      |                                               |
| 3                       | 39.9                                 | 1.41 (ddd, 4.5, 10.8, 14.0)                   |                         |                                      |                                               |
|                         |                                      | 1.47 (ddd, 4.5, 10.4, 14.0)                   |                         |                                      |                                               |
| 4                       | 24.3                                 | 0.90 (br m)                                   |                         |                                      |                                               |
| 5                       | 21.1                                 | 0.71 (d, 6.5)                                 |                         |                                      |                                               |
| 6                       | 22.9                                 | 0.78 (d, 6.5)                                 |                         |                                      |                                               |

<sup>a</sup> The <sup>1</sup>H and <sup>13</sup>C NMR spectra were externally calibrated to NaOAc ( $\delta_{\text{H}}$  1.90 and 8.44 and  $\delta_{\text{C}}$  24.0 and 171.7; 10 mg in 500  $\mu\text{L}$  D<sub>2</sub>O) (H. E. Gottlieb, V. Kotlyar and A. Nudelman, *J. Org. Chem.*, 1997, **62**, 7512). <sup>b</sup> Numbering from the carbonyl group of the amino acids. <sup>c</sup> <sup>13</sup>C NMR chemical shifts quoted to one decimal except where resonances resolved, <sup>d</sup> s = singlet, d = doublet, t = triplet, o = overlap. <sup>e</sup> assignment may be interchanged, \* = co-incident resonances.
